# Supplementary material for: Identification and characterization of phage protein and its activity against two strains of multidrug-resistant Pseudomonas aeruginosa
Source: PubMed Central journal article supplement (PMC6748951; doi:10.1038/s41598-019-50030-5), 2019-09-17
Supplement: 41598_2019_50030_MOESM1_ESM.pdf [file 41598_2019_50030_MOESM1_ESM.pdf]

## Supplementary Data

### Identification and characterization of phage protein and its activity against two strains of multidrug-resistant *Pseudomonas aeruginosa*

Fairoz Al-Wrafy<sup>1,2\*</sup>, Ewa Brzozowska<sup>2\*</sup>, Sabina Górska<sup>2</sup>, Marek Drab<sup>2</sup>, Magdalena Strus<sup>3</sup>,  
Andrzej Gamian<sup>2</sup>

<sup>1</sup> Department of Applied Microbiology, Faculty of Applied Science, Taiz University, 6350 Taiz,  
Yemen.

<sup>2</sup> Hirszfeld Institute of Immunology and Experimental Therapy, Polish Academy of Sciences, 53-114  
Wrocław, Poland.

<sup>3</sup> Department of Microbiology, Medical College, Jagiellonian University, 31-007 Krakow, Poland.

\* Correspondence:

Fairoz Al-Wrafy: f\_alwrafy@yahoo.com

Ewa Brzozowska: ewa.brzozowska@hirszfeld.pl

| Antimicrobial agent         | Disk content | Zone diameter, nearest whole [mm] |   |       |   |
|-----------------------------|--------------|-----------------------------------|---|-------|---|
|                             |              | PAR21                             |   | PAR50 |   |
| Piperacillin                | 100 µg       | 28                                | S | 14    | R |
| Piperacillin- tazobactam    | 100/10 µg    | 28                                | S | 25    | S |
| Ticarcillin-clavulanic acid | 75/10 µg     | 19                                | I | 14    | R |
| Ceftazidime                 | 30 µg        | 27                                | S | 25    | S |
| Cefepime                    | 30 µg        | 18                                | S | 17    | S |
| Cefotaxime                  | 30 µg        | 20                                | I | 22    | I |
| Ceftriaxone                 | 30 µg        | < 13                              | R | < 13  | R |
| Imipenem                    | 10 µg        | 24                                | S | 30    | S |
| Ciprofloxacin               | 5 µg         | 32                                | S | 35    | S |
| Gentamicin                  | 10 µg        | 17                                | S | <12   | R |
| Amikacin                    | 30 µg        | 20                                | S | 14    | R |
| Tobramycin                  | 10 µg        | 18                                | S | <12   | R |
| Netilmicin                  | 30 µg        | 20                                | S | 20    | S |

**Table S1.** Diameters of inhibition zones of different antibiotics against *P. aeruginosa* PAR21 and PAR50. R. Resistant, I. Intermediate and S. Susceptible

| Antimicrobial agent         | Disk content | Zone diameter, nearest whole [mm] |       |      |
|-----------------------------|--------------|-----------------------------------|-------|------|
|                             |              | R                                 | I     | S    |
| Piperacillin                | 100 µg       | ≤ 14                              | 15-20 | ≥21  |
| Piperacillin- tazobactam    | 100/10 µg    | ≤ 14                              | 15-20 | ≥21  |
| Ticarcillin-clavulanic acid | 75/10 µg     | ≤ 15                              | 16-23 | ≥24  |
| Ceftazidime                 | 30 µg        | ≤ 14                              | 15-17 | ≥ 18 |
| Cefepime                    | 30 µg        | ≤ 14                              | 15-17 | ≥ 18 |
| Cefotaxime                  | 30 µg        | ≤ 14                              | 15-22 | ≥ 23 |
| Ceftriaxone                 | 30 µg        | ≤13                               | 14-20 | ≥ 21 |
| Imipenm                     | 10 µg        | ≤ 13                              | 14-15 | ≥16  |
| Ciprofloxacin               | 5 µg         | ≤15                               | 16-20 | ≥21  |
| Gentamicin                  | 10 µg        | ≤12                               | 13-14 | ≥15  |
| Amikacin                    | 30 µg        | ≤ 14                              | 15-16 | ≥17  |
| Tobramycin                  | 10 µg        | ≤12                               | 13-14 | ≥15  |
| Netilmicin                  | 30 µg        | ≤12                               | 13-14 | ≥15  |

**Table S2.** The inhibition zone diameter for each antibiotic according to the criteria published by the Clinical and Laboratory Standards Institute (CLSI)<sup>1</sup>. **R.** Resistant, **I.** Intermediate and **S.** Susceptible

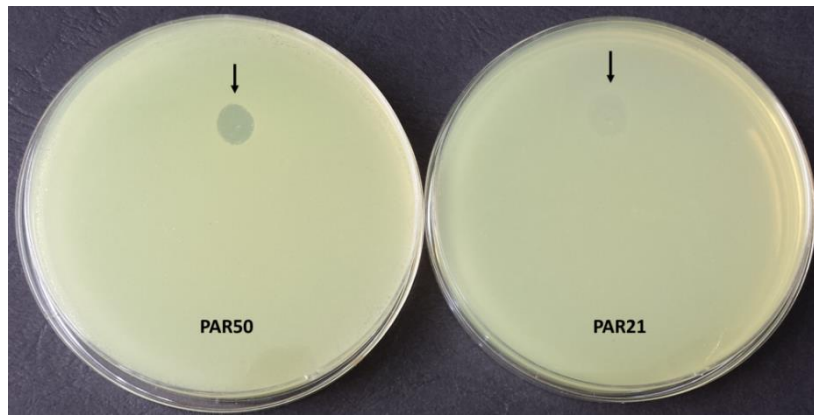

**Figure S1.** Spot assay using 10  $\mu$ l phage sample applied on a lawn of *P. aeruginosa* strains. Translucent clearance at the spot area was observed against PAR50, but not PAR21.

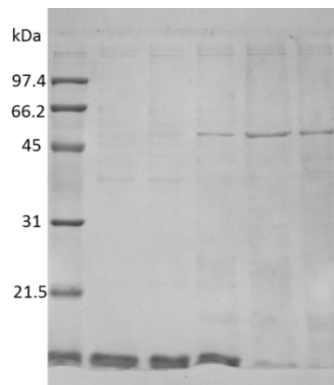

**Figure S2.** Full-length uncropped gel used in figure 1.

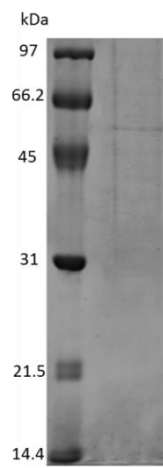

**Figure S3.** Full-length gel used in figure 2.

```

1  MISQSRYIRI  ISGVGAGAPV  AGRKLILRVM  TTNNVIPPGI  VIEFDNANAV
51  LSYFGAQSEE  YQRAAAYFKF  ISKSVNSPSS  ISFARWVNTA  IAPMVVGDNL
101 PKTIADFAGF  SAGVLTIMVG  AAEQNITAID  TSAATSMDNV  ASIIQTEIRK
151 NADPQLAQAT  VTWNQNTNQF  TLVGATIGTG  VLAVAKSADP  QDMSTALGWS
201 TSNVVNVAGQ  AADLPDAAVA  KSTNVSNNFG  SFLFAGAPLD  NDQIKAVSAW
251 NAAQNNQFIY  TVATSLANLG  TLFTLVNGNA  GTALNVLSAT  AANDFVEQCP
301 SEILAATNYD  EPGASQNYMY  YQFPGRNITV  SDDTVANTVD  KSRGNYIGVT
351 QANGQQLAFY  QRGILCGGPT  DAVDMNVYAN  EIWLKSAIAQ  ALLDLFLNVN
401 AVPASSTGEA  MTLAVLQPVL  DKATANGTFT  YGKEISAVQQ  QYITQVTGDR
451 RAWRQVQTLG  CWINITFSSY  TNSNTGLETEW  KANYTLIYSK  GDAIRFVEGS
501 DVMI

```

**Figure S4.** Identification of PA-PP1 protein using mass spectrometer LC-MS/MS. The protein sequence, matched peptides are shown in bold red.

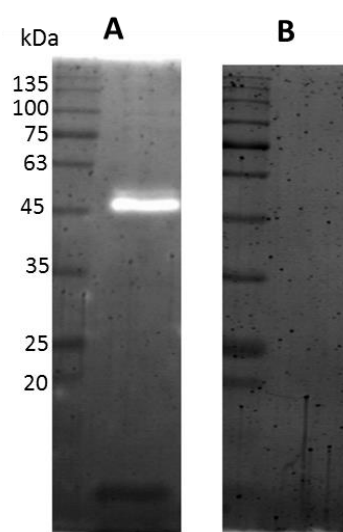

**Figure S5.** Full-length gel used in figure 3



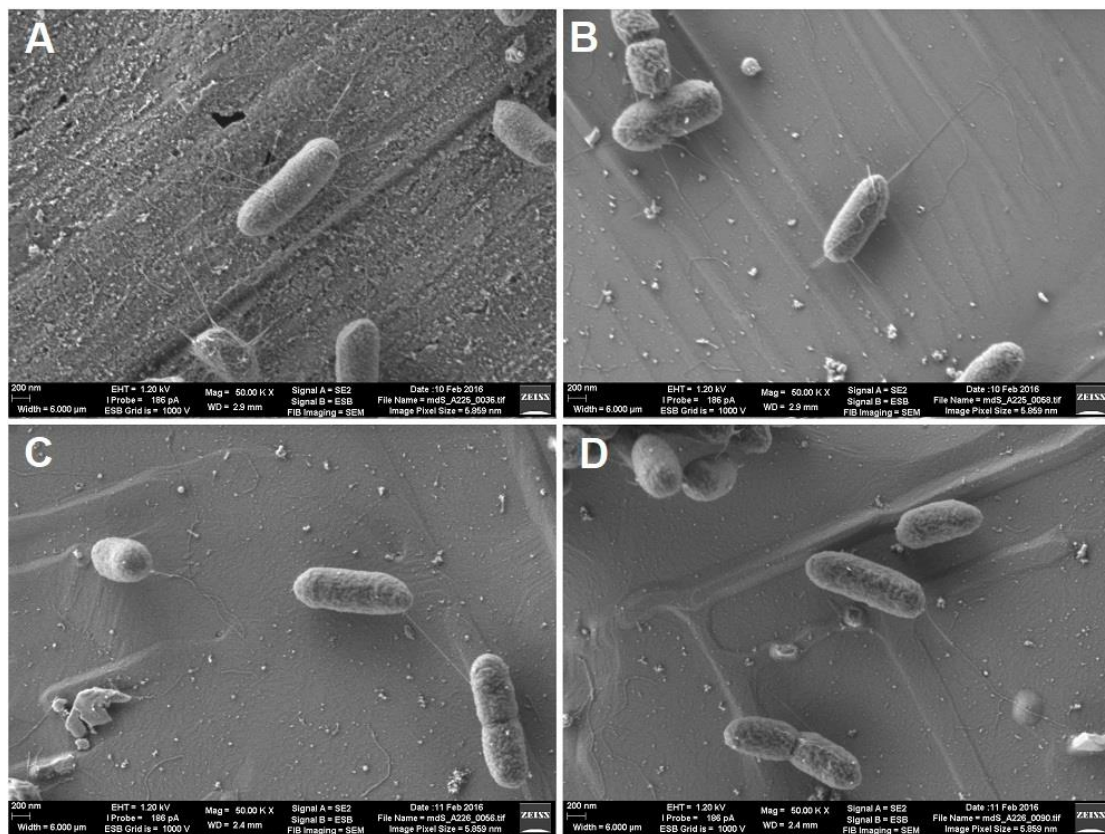

**Figure S6.** Low voltage scanning electron microscopy (LV-SEM) to determine the effects of PA-PP on *P. aeruginosa* PAR21. A and B represent intact cells not exposed to protein. C and D represent PAR21 cells exposed to PA-PP, which appear similar to the non-treated cells showing no defects.

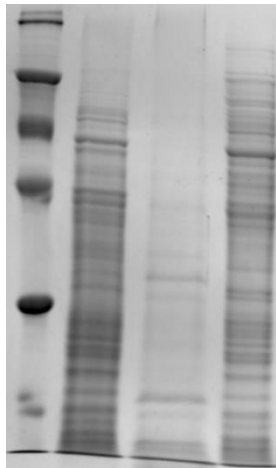

**Figure S7.** Full-length gel used in figure 8.

```

1 MKLKNTLGVV IGSLVAASAM NAFAQGQNSV EIEAFGKRYF TDSVRNMKNA
51 DLYGGSIGYF LTDDVELALS YGEYHDVRGT YETGNKKVHG NLTSLDAIYH
101 FGTPGVGLRP YVSAGLAHQN ITNINSDSQG RQQMTMANIG AGLKYYFTEN
151 FFAKASLDGQ YGLEKRDNGH QGEWMAGLV GFNFGGSKAA PAPEPVADVC
201 SDSDNDGVCD NVDKCPDTPA NVTVDANGCP AVAEVVRVQL DVKFDFDKSK
251 VKENSYADIK NLADFMKQYP STSTTVEGHT DSVGTDAYNQ KLSEERANAV
301 RDVLVNEYGV EGGRVNAVGY GESRPVADNA TAEGRINRR VEAEEVEAEAK

```

**Figure S8.** Identification of bacterial OM protein which was targeted by PA-PP protein mass spectrometer LC-MS/MS. The protein sequence obtained from the mass spectrometer LC-MS/MS, matched peptides are shown in bold red.

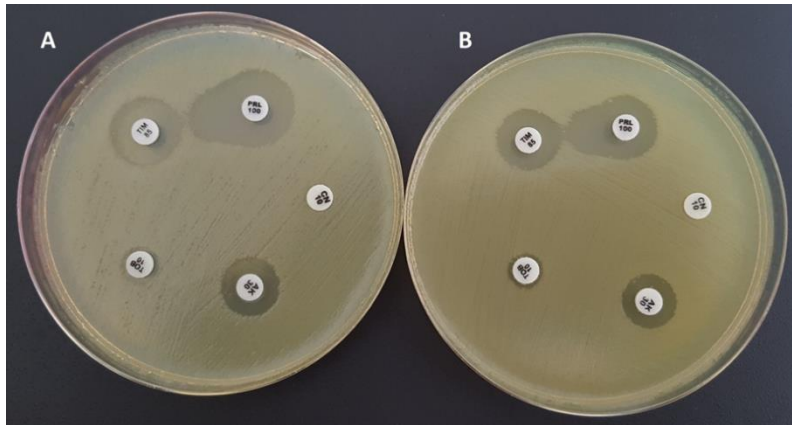

**Figure S9.** Synergistic activity of antibiotics and PA-PP. **A.** Antibiotics were applied to *P. aeruginosa* PAR50 treated with PA-PP protein. **B.** Antibiotics were applied to untreated *P. aeruginosa* PAR50.

1- Clinical and Laboratory Standards Institute (CLSI). Performance standards for antimicrobial susceptibility testing. Informational supplement M100–S24, 24th ed. 34, 58–60. (Clinical and Laboratory Standards Institute, Wayne, PA. USA. 2014).
